# Supplementary material for: Malaria Coinfections in Febrile Pediatric Inpatients: A Hospital-Based Study From Ghana
Source: PubMed Central journal article supplement — Clin Infect Dis. 2018 Feb 2;66(12):1838–45. doi: 10.1093/cid/cix1120 (PMC5982794; doi:10.1093/cid/cix1120), 2018-02-02
Supplement: cix1120_suppl_supplementary_methods.pdf [file cix1120_suppl_supplementary_methods.pdf]

## 1 Supplement Material and Methods

2

### 3 1. Processing of specimens

4

5 Two independent slide readers conducted malaria microscopy on Giemsa stained  
6 thick and thin smears. In case of discrepancies a third decisive reading by an  
7 additional reader was performed (see supplement material and methods for more  
8 details). From CSF, a direct cell count was done using a Fuchs-Rosenthal counting  
9 chamber. Urine was tested for the presence of leucocytes and nitrite using dipsticks  
10 (Urine Control Stripes, Diagnostik Nord, Germany). Alanine transaminase (ALT) and  
11 aspartate transaminase (AST) concentrations were measured in all serum samples on a  
12 Biolyzer 100 instrument (Analyticon, Biotechnologies, Lichtenfels, Germany).  
13 Patients with ALT or AST concentrations above 150 U/L were screened for hepatitis  
14 A, B and E virus (see **supplement table S1**).

15 Bacterial cultures were performed on standard media from positive-flagged blood  
16 culture bottles (BACTEC Peds Plus/F, Becton Dickinson, USA), from CSF, urine and  
17 stool specimens (all Oxoid, Basingstoke, UK). Environmental bacteria and bacteria  
18 belonging to the skin flora (e.g. coagulase negative staphylococci, *Corynebacterium*  
19 spp. and *Bacillus* spp.) were considered as contaminants. Bacterial isolates were  
20 identified biochemically with the VITEK 2 system (bioMérieux, Marcy L'Etoile,  
21 France) and MALDI-TOF MS (Bruker Daltonics, Bremen, Germany). *Salmonella*  
22 isolates were serotyped by a multiplex PCR for *S. Typhi*, *S. Typhimurium*, *S.*  
23 *Enteritidis* and *S. Dublin* as described before [1]. PCR non-typable *Salmonella* strains  
24 were serotyped following the Kauffmann-White-Le Minor scheme [2].

25 DNA was extracted from EDTA blood with the GenoType DNA extraction Kit (Hain

26 Lifescience, Nehren, Germany) and from stool using the QIAamp DNA Stool Mini  
27 Kit (Qiagen, Hilden, Germany) including six freeze-thaw cycles. DNA and RNA was  
28 extracted from all serum, CSF and throat swabs samples using the RTP Pathogen Kit  
29 (Stratec biomedical, Birkenfeld, Germany). A panel of PCRs for respiratory,  
30 gastrointestinal and systemic bacterial, viral and parasitic pathogens was applied as  
31 detailed in the **supplement table S3**.

32 A screening and confirmatory HIV rapid diagnostic test was offered to all study  
33 participants above 18 months of age after separate informed consent was signed. 16S  
34 rRNA gene-based identification of bacterial pathogens and next-generation  
35 sequencing (NGS) for viruses were performed from CSF samples (see section 3. and  
36 4.).

37

## 38 **2. Malaria Diagnostics**

39 Thick and thin blood smears were made from venous samples and stained with 10%  
40 filtered Giemsa. *Plasmodium* species were differentiated and parasitaemia was  
41 estimated by counting the number of asexual forms of *Plasmodium* corresponding to  
42 200/500 leukocytes in the thick blood film, and 5000 erythrocytes in the thin blood  
43 film according to parasitaemia level. A slide was declared negative when no asexual  
44 parasites were detected against 100 fields examined on a thick film. Each slide was  
45 examined by two independent expert microscopists. A slide was read by a third  
46 microscopist in case of at least one of the following discrepancies: i) in the species, ii)  
47 in the positivity of the smears, iii) in the parasitaemia by a factor of  $\geq 2$  fold, iv)  
48 discordant results in case of parasitaemia  $< 2000$  parasite/ $\mu\text{L}$  or by a factor of  $\geq 4$   
49 fold, or v) discordant results in case of parasitemia  $> 2000$  parasite/ $\mu\text{L}$ . For a slide  
50 reading to be considered valid, a minimum of two concordant readings by two

51 different expert microscopists was necessary. The parasitaemia was calculated by the  
52 mean of the two closest values for each slide.

53

### 54 3. 16S RNA/DNA gene sequencing for CSF patient samples

55 Microbial DNA was extracted out of CSF patient samples using the RTP® Pathogen  
56 Kit (Stratec biomedical, Birkenfeld, Germany) according to the manufacturers  
57 instructions. 16S rRNA gene sequencing was performed based on the principle  
58 established by Weisburg et al., 1991 [3]. Two different primer pairs were used to  
59 amplify the rRNA gene (see table 1) using Phusion High Fidelity DNA Polymerase  
60 (Thermo Scientific, Waltham, US) with 3% DMSO for 35-40 cycles with the  
61 following reaction conditions and then sent for sequencing (SANGER):

62 98°C 5min

63 98°C 10sec

64 55°C 30sec

65 72°C 45sec

66 72°C 7min

67 **Table 1.** Primer pairs used to amplify the rRNA gene

| Primer name | Name (Alm et al. 1996[4]) | Sequence                                  |
|-------------|---------------------------|-------------------------------------------|
| F27*        |                           | 5'- AGA GTT TGA TCA TGG CTC AG -3'        |
| 1492R       | S-D-Bact-1492-a-A-22      | 5'- TAC GGY TAC CTT GTT ACG ACT T -<br>3' |
| GM3F        | S-D-Bact-008-a-S-16       | 5'- AGA GTT TGA TCM TGG C -3'             |
| GM4R        | S-D-Bact-1492-a-A-16      | 5'- TAC CTT GTT ACG ACT T -3'             |

68

69

#### 70 4. Next Generation Sequencing – Material and methods

71

72 The CSF samples were filtered through a 0.45- $\mu$ m filter (Millipore, Darmstadt,  
73 Germany) to remove larger debris, bacteria and digested with a mixture of nucleases  
74 (Turbo DNase, Ambion, Carlsbad, CA, USA; Baseline-ZERO, Epicenter, Madison,  
75 WI, USA; Benzonase, Novagen, San Diego, CA, USA; RNase One, Promega,  
76 Fitchburg, WI, USA) to digest unprotected nucleic acids including host DNA/RNA.  
77 Enriched viral particles were then extracted, fragmented, reverse-transcribed, ends  
78 repaired, dA-tailed, adaptor ligated and purified. Library preparation was performed  
79 using the Nextera XT library prep Kit (Illumina, San Diego, CA, USA). Next  
80 generation sequencing was performed on the MiSeq Illumina platform (2 x 300 bp  
81 paired-end sequencing). Resulting raw reads were trimmed, de-duplicated and de  
82 novo assembled using a customized NGS pipeline. The assembled contigs and  
83 unassembled singlets were compared with a viral proteome database using BLASTx  
84 using E-value cutoff 0.01.

85

#### 86 References

- 87 1. Al-Emran HM, Hahn A, Baum J, et al. Diagnosing Salmonella enterica  
88 Serovar Typhi Infections by Polymerase Chain Reaction Using EDTA  
89 Blood Samples of Febrile Patients From Burkina Faso. *Clin Infect Dis*  
90 **2016**; 62 Suppl 1: S37-41.
- 91 2. Grimont P, Weill F. Antigenic Formulae of the Salmonella Serovars. WHO  
92 Collaborating Centre for Reference and Research on Salmonella Vol. 9th  
93 Edition: World Health Organization, **2007**:1-166.
- 94 3. Weisburg WG, Barns SM, Pelletier DA, Lane DJ. 16S ribosomal DNA  
95 amplification for phylogenetic study. *J Bacteriol* **1991**; 173(2): 697-703.
- 96 4. Alm EW, Oerther DB, Larsen N, Stahl DA, Raskin L. The oligonucleotide  
97 probe database. *Appl Environ Microbiol* **1996**; 62(10): 3557-9.
- 98
