# Supplementary material for: Malaria Coinfections in Febrile Pediatric Inpatients: A Hospital-Based Study From Ghana
Source: PubMed Central journal article supplement — Clin Infect Dis. 2018 Feb 2;66(12):1838–45. doi: 10.1093/cid/cix1120 (PMC5982794; doi:10.1093/cid/cix1120), 2018-02-02
Supplement: cix1120_suppl_supplementary_ssap.pdf [file cix1120_suppl_supplementary_ssap.pdf]

# Statistical Analysis Plan (SAP)

## The Fever without Source Study

**SAP version:** 1.3  
**File created:** 28.12.2015  
**Last changes:** 28.03.2017  
**Author:** Dr Ralf Krumkamp

### Table of contents:

|                                  |   |
|----------------------------------|---|
| 1. Objectives .....              | 2 |
| 2. Study group, study area ..... | 2 |
| 3. Study design .....            | 2 |
| 4. Study outcomes.....           | 2 |
| 5. Sample size .....             | 3 |
| 6. Descriptive analysis .....    | 3 |
| 7. Measures of association.....  | 3 |
| 8. Missing data.....             | 4 |
| 9. Data management .....         | 4 |

## 30 **1. Objectives**

31 The Fever without Source Study (FWS) was designed to systematically assess clinical (i.e.,  
32 based on disease symptoms) and microbiological (i.e., based on identified microbiological  
33 pathogens) diagnoses in children admitted to a hospital in a rural region in Ghana. Aims of  
34 the study were

- 35 • an exact diagnosis and identification of causes of severe febrile illnesses in  
36 hospitalised children,
- 37 • the determination of the frequency and distribution of severe febrile illnesses in  
38 hospitalised children,
- 39 • to link microbiological and clinical diagnoses, and
- 40 • the analysis of co-infection dynamics with the focus on *Plasmodium falciparum*  
41 parasitaemia.

## 42 **2. Study group, study area**

43 Children ( $\geq 30$  days and  $\leq 15$  years) with fever ( $\geq 38^{\circ}\text{C}$ ) admitted to the Children's Ward of  
44 the Agogo Presbyterian Hospital (APH) in the Asante Akim North Municipality, Ashanti  
45 Region, Ghana, were eligible to participate in the study. Furthermore, children below 15 years  
46 of age with a temperature  $< 37.5^{\circ}\text{C}$  and without signs of infection were recruited at  
47 vaccination clinics in the surroundings of the APH. Participants were recruited between  
48 November 4<sup>th</sup>, 2013 and April 30<sup>th</sup>, 2015

49 Asante Akim North has an estimated population of 142,400 inhabitants, spread over an  
50 area of 1,160 square kilometres. The region has a tropical climate and is mainly covered by  
51 secondary rain forest and cultivated land. Malaria is highly endemic in that area with seasonal  
52 peaks.

## 53 **3. Study design**

54 At admission, children were recruited in the study and clinical and laboratory parameter  
55 were determined. Hence, the study can be classified as cross-sectional conducted over a  
56 period of 18 months.

## 57 **4. Study outcomes**

58 Primary study outcomes are established clinical diagnoses based on observed disease  
59 symptoms and additional clinical parameters. Main diagnoses considered are *Plasmodium*  
60 spp. infection, lower respiratory tract infection (LRTI) and pneumonia, urinary tract infection  
61 (UTI), gastrointestinal and abdominal infection, bloodstream infection, and infection of the

62 central nervous system or meningitis. The remaining rare diagnoses are summarised into the  
63 category “others”.

64 Within these diagnoses, the presence of potentially causative pathogens are analysed,  
65 which builds the respective subgroups of diagnoses with and diagnoses without pathogens  
66 detected.

## 67 **5. Sample size**

68 The overall sample size is calculated to estimate the proportion of a diagnosis with  
69 sufficient precision. Considering a prevalence of a diagnosis of 8% within the study group, a  
70 sample size of 984 would be needed to retrieve an estimate with 5% precision (95%-  
71 confidence interval [CI]). Hence, a sample size of 1,000 was considered as the minimum  
72 sample size for the study. ‘

## 73 **6. Descriptive analysis**

74 Descriptive statistics are applied to summarise patient data. Categorical variables are  
75 displayed as frequencies with percentages, non-normally distributed continuous data as the  
76 median along with the interquartile range (IQR) and normally distributed continuous variables  
77 as the mean with the standard deviation (SD).

78 Estimating the frequency of diagnoses in study children is a primary study outcome, which  
79 is analysed using single proportions. Subgroups are considered in order to assess whether  
80 diagnoses differ among strata of patient characteristics. To display age effects, the four age  
81 categories 0–<1, 1–<2, 2–<4 and  $\geq 4$  years as well as the dichotomous indicator with  
82 categories  $\leq 2$  and  $> 2$  are established. Based on individual parasite counts four categories are  
83 introduced, namely (i) no malaria parasites detected, (ii) 1–10,000 parasites per  $\mu\text{l}$ , (iii)  
84  $> 10,000$  to 100,000 parasites per  $\mu\text{l}$ , and (iv) patients with above 100,000 parasites per  $\mu\text{l}$ .

## 85 **7. Measures of association**

86 To evaluate the likelihood of a co-infection in children with parasitaemia the risk ratio  
87 (RR) with corresponding 95%-confidence interval (CI) is calculated. The RR is the ratio of  
88 the fraction of children with a diagnosis of interest in all children with parasitaemia to the  
89 fraction of children with this diagnosis but without parasitaemia. In the present data  
90 associations between diagnoses are likely to be confounded by age. Hence age-stratified  
91 analyses using the Mantel-Haenszel method is considered. Parasitaemia is defined as presence  
92 of fever along with any *Plasmodium* spp. parasite in a blood sample.

93 Due to the exploratory nature of the data analysis, no significance testing is applied. All  
94 data analyses are performed with Stata 14 (StataCorp LP, College Station, USA).

95 **8. Missing data**

96 The study group used for the analysis is selected to have full data in the core variables,  
97 namely basic patient characteristics (e.g., age and sex) and established clinical diagnoses and  
98 in the microbiological diagnoses malaria and bacteraemia. Pathogens were analysed  
99 according to a clinical algorithm. For example, stool samples were taken in children with  
100 diarrhoea to test for the presence of gastrointestinal pathogens. Due to lacking samples, in  
101 some cases laboratory results can be missing, which were excluded from the analysis. Thus,  
102 the distribution of pathogens is based on the collected patient samples. Since we assume that  
103 samples are missing completely at random (i.e., the pathogen present in a sample does not  
104 affect the likelihood to miss out a sample), we believe that the proportion of pathogens are not  
105 biased due to missing values. However, the overall frequency will be underestimated.

106 Systematic missings (e.g., in HIV diagnosis due to withdrawn informed consent) will be  
107 described and the actual denominator will be presented in the respective calculations.

108 **9. Data management**

109 The 4<sup>th</sup> Dimension database management system is used to enter and manage the study  
110 data. The database implements plausibility checks in order to highlight implausible entries  
111 during the entry process. Data is double entered and in case of inconsistency entries are  
112 evaluated and revised. The data is pseudonymised, thus throughout data entry, data  
113 management and data analysis no link between an observation and an individual can be  
114 established.
