# Supplementary material for: Malaria Coinfections in Febrile Pediatric Inpatients: A Hospital-Based Study From Ghana
Source: PubMed Central journal article supplement — Clin Infect Dis. 2018 Feb 2;66(12):1838–45. doi: 10.1093/cid/cix1120 (PMC5982794; doi:10.1093/cid/cix1120), 2018-02-02
Supplement: cix1120_suppl_supplementary_table_s3.pdf [file cix1120_suppl_supplementary_table_s3.pdf]

| Supplement table S3. Final diagnoses and identified pathogens for all hospitalised children (N=1,238) <sup>a,b</sup> | n/N (%)                   |
|----------------------------------------------------------------------------------------------------------------------|---------------------------|
| <b>Plasmodium spp. parasitaemia</b>                                                                                  | <b>728 (59)</b>           |
| <i>Plasmodium falciparum</i>                                                                                         | 679/728 (92)              |
| <i>Plasmodium ovale</i>                                                                                              | 6/728 (1)                 |
| <i>Plasmodium malariae</i>                                                                                           | 2/728 (0)                 |
| <i>P. falciparum/P. malariae</i>                                                                                     | 35/728 (5)                |
| <i>P. falciparum/P. ovale</i>                                                                                        | 6/728 (1)                 |
| Parasite count in $\mu\text{l}$ [median(IQR)]                                                                        | 74,385 (25,508–201,407)   |
| Parasite count in $\mu\text{l}$                                                                                      |                           |
| $\geq 1$ to 10,000                                                                                                   | 105/728 (14)              |
| $> 10,000$ to 100,000                                                                                                | 313/728 (43)              |
| $> 100,000$                                                                                                          | 310/728 (43)              |
| <b>Severe malaria</b>                                                                                                | <b>117/1,238 (9)</b>      |
| Parasite count in $\mu\text{l}$ [median(IQR)]                                                                        | 283,566 (122,360–477,764) |
| <b>Cerebral malaria</b>                                                                                              | 17/117 (15)               |
| <b>Lower respiratory tract infection<sup>c</sup></b>                                                                 | <b>290 (23)</b>           |
| Pathogen detected                                                                                                    | 209/290 (72)              |
| <i>Streptococcus pneumoniae</i>                                                                                      | 134/209 (64)              |
| Adenovirus                                                                                                           | 54/209 (26)               |
| <i>Haemophilus influenzae</i>                                                                                        | 46/209 (22)               |
| Rhinovirus                                                                                                           | 42/209 (20)               |
| Enterovirus                                                                                                          | 40/209 (19)               |
| HCoV <sup>d</sup> (NL63, 229E, OC43, HKU1)                                                                           | 25/209 (12)               |
| <i>Chlamydiae</i>                                                                                                    | 25/209 (12)               |
| Influenza A/B                                                                                                        | 17/209 (8)                |
| Parainfluenzavirus 1–4                                                                                               | 16/209 (8)                |
| <i>Mycoplasma pneumoniae</i>                                                                                         | 7/209 (3)                 |
| hMPV <sup>e</sup>                                                                                                    | 2/209 (1)                 |
| RSV <sup>f</sup>                                                                                                     | 1/209 (0)                 |
| <i>Legionella</i> spp.                                                                                               | 1/209 (0)                 |
| <b>Urinary tract infection</b>                                                                                       | <b>218 (18)</b>           |
| Pathogen detected                                                                                                    | 32/218 (15)               |
| <i>Escherichia coli</i>                                                                                              | 25/32 (66)                |
| <i>Klebsiella pneumoniae</i>                                                                                         | 7/32 (22)                 |
| <i>Streptococcus</i> spp.                                                                                            | 4/32 (13)                 |
| <i>Enterococcus</i> spp.                                                                                             | 4/32 (13)                 |
| <i>Pseudomonas aeruginosa</i>                                                                                        | 1/32 (3)                  |
| <i>Acinetobacter</i> spp.                                                                                            | 1/32 (3)                  |
| <i>Pantoea</i> spp.                                                                                                  | 1/32 (3)                  |
| <i>Enterobacter</i> spp.                                                                                             | 1/32 (3)                  |

|                                                             |                 |
|-------------------------------------------------------------|-----------------|
| <i>Staphylococcus aureus</i>                                | 1/32 (3)        |
| <b>Gastrointestinal infection</b>                           | <b>210 (17)</b> |
| Pathogen detected                                           | 97/210 (40)     |
| Rotavirus                                                   | 32/97 (33)      |
| <i>Giardia spp.</i>                                         | 28/97 (29)      |
| Adenovirus                                                  | 26/97 (27)      |
| Shigella/EIEC                                               | 25/97 (26)      |
| <i>Campylobacter spp.</i>                                   | 21/97 (22)      |
| Norovirus                                                   | 14/97 (14)      |
| <i>Salmonella spp.</i>                                      | 10/97 (10)      |
| <i>Cryptosporidium spp.</i>                                 | 5/97 (5)        |
| Astrovirus                                                  | 5/97 (5)        |
| Sapovirus                                                   | 2/97 (2)        |
| <i>Cyclospora cayetanensis</i>                              | 2/97 (2)        |
| EHEC                                                        | 1/97 (1)        |
| <i>Clostridium difficile</i>                                | 0 (0)           |
| <i>Yersinia enterocolitica</i>                              | 0 (0)           |
| <i>Entamoeba histolytica</i>                                | 0 (0)           |
| <b>Pneumonia</b>                                            | <b>120 (10)</b> |
| Pathogen detected                                           | 90/120 (75)     |
| <i>Streptococcus pneumoniae</i>                             | 58/90 (64)      |
| Rhinovirus                                                  | 19/90 (21)      |
| <i>Haemophilus influenzae</i>                               | 18/90 (20)      |
| <i>Chlamydiae</i>                                           | 14/90 (16)      |
| Parainfluenzavirus 1–4                                      | 14/90 (16)      |
| Enterovirus                                                 | 13/90 (14)      |
| Adenovirus                                                  | 9/90 (10)       |
| Influenza A/B                                               | 8/90 (9)        |
| RSV                                                         | 7/90 (8)        |
| HCoV (NL63, 229E, OC43, HKU1)                               | 7/90 (8)        |
| <i>Mycoplasma pneumoniae</i>                                | 3/90 (3)        |
| hMPV <sup>e</sup>                                           | 2/90 (2)        |
| <b>Unidentified</b>                                         | <b>113 (9)</b>  |
| <b>Skin/soft tissue or joint/bone infection<sup>g</sup></b> | <b>82 (7)</b>   |
| <b>Bloodstream infection</b>                                | <b>62 (5)</b>   |
| <i>Salmonella spp.</i>                                      | 47/62 (76)      |
| Non typhoidal <i>Salmonella spp.</i>                        | 28/47 (60)      |
| <i>Salmonella</i> Typhimurium                               | 14/47 (30)      |
| <i>Salmonella</i> Dublin                                    | 7/47 (15)       |
| <i>Salmonella</i> Enteritidis                               | 6/47 (13)       |
| <i>Salmonella</i> Westphalia                                | 1/47 (2)        |
| <i>Salmonella enterica</i> serovar Typhi                    | 19/47 (40)      |

|                                              |                       |
|----------------------------------------------|-----------------------|
| <i>Streptococcus pneumoniae</i>              | 6/62 (10)             |
| <i>Staphylococcus aureus</i>                 | 3/62 (5)              |
| <i>Haemophilus influenzae</i>                | 2/62 (3)              |
| <i>Acinetobacter</i> spp.                    | 1/62 (2)              |
| <i>Escherichia coli</i>                      | 1/62 (2)              |
| <i>Klebsiella oxytoca</i>                    | 1/62 (2)              |
| <i>Moraxella catarrhalis</i>                 | 1/62 (2)              |
| <b>Systemic viral disease</b>                | <b>58 (5)</b>         |
| Parvovirus B19                               | 39/58 (67)            |
| Human Immunodeficiency Virus                 | 15/58 (26)            |
| Hepatitis B Virus                            | 3/58 <sup>h</sup> (5) |
| Hepatitis A Virus                            | 2/58 <sup>h</sup> (3) |
| Hepatitis E Virus                            | 0/58                  |
| Flavivirus                                   | 0/1,238               |
| Alphavirus                                   | 0/1,238               |
| <b>Intra abdominal infection<sup>i</sup></b> | <b>7 (1)</b>          |
| <b>CNS infection/meningitis</b>              | <b>11 (1)</b>         |
| Pathogen detected                            | 3/11 (27)             |
| <i>Streptococcus pneumoniae</i>              | 2/11 (18)             |
| <i>Klebsiella oxytoca</i>                    | 1/11 (9)              |
| <b>Clinical Diagnoses</b>                    | <b>4 (0)</b>          |
| Mastoiditis                                  | 3/1,238 (0)           |
| Mumps                                        | 1/1,238 (0)           |
| <b>Pulmonary tuberculosis</b>                | <b>2 (0)</b>          |
| <b>Lymphatic filariasis</b>                  | <b>1 (0)</b>          |
| <i>Mansonella perstans</i>                   | 1 (0)                 |
| <b>Zoonotic infection</b>                    | <b>0 (0)</b>          |
| <i>Leptospira</i> spp.                       | 0/1,238               |
| <i>Brucella</i> spp.                         | 0/1,238               |
| <i>Coxiella</i> spp.                         | 0/1,238               |
| <i>Bartonella</i> spp.                       | 0/1,238               |
| <i>Borrelia</i> spp.                         | 0/1,238               |
| <i>Rickettsia</i> spp.                       | 0/1,238               |

<sup>a</sup> According to case definitions (see supplement table S1).

<sup>b</sup> Multiple diagnoses and/or pathogens per patient possible.

<sup>c</sup> Excluding pneumonia diagnosis.

<sup>d</sup> Human Coronavirus.

<sup>e</sup> Human Metapneumovirus.

<sup>f</sup> Respiratory syncytial virus.

<sup>g</sup> Only clinical diagnosis available.

<sup>h</sup> If ALT/AST  $\geq$  150 U/l.

<sup>i</sup> Appendicitis, n=3; peritonitis, n=1; intussusception, n=1; ileal perforation due to typhoid fever, n=1

and mesenteric lymphadenitis (n=1).
